# Supplementary material
Source: publisher figshare collection journal article supplement (https://frontiersin.figshare.com/ndownloader/files/30422004)
Supplement: Supplementary file 1 [file 30422004]

# *Supplementary Material 1*

# *Details for preparation and development of the survey*

This document details, following the recommendations of Hernández-Sampieri et al. (2010) and Castillo & Peña-Mondragón (2015), the preparation and development of the survey carried out to evaluate the criteria of value given to the native ecosystem and disposition of the community to carry out restoration actions.

## 1. Design and preparation of the survey

Pilot tests were carried out for the design and preparation of the survey. These were applied mainly to university students, as well as to security personnel, academics and administrative workers at the Faculties of Political and Social Sciences, Sciences and Psychology at the main campus of the National Autonomous University of Mexico. These pilot tests allowed us the detection of certain difficulties regarding the questions, the format and the way to conduct the survey itself. Once modifications to the survey were done to solve the problems a new pilot test was implemented until there were no major problems found. In addition, to fine tune the survey it was revised by an expert.

Permission to carry out the survey was requested to the authorities of the university entities around the Olympic Stadium. These authorities were identified through the search of information in web directories of the university entities and by visiting these places and asking the security personnel for the authorities of the facilities. Once the authorities were identified, a letter was given to them asking for the corresponding permission. In general, this letter specified the following:

1. Name and ID number of the researcher that would conduct the survey.
2. Title of the research project.
3. Adscription number of the research to the project PAPIIT-UNAM IV200117.
4. General objective of the survey: to evaluate the social feasibility of restoration of the native vegetation in lava field remnants at the corresponding university entity.
5. Period in which surveys were going to be carried out.
6. Information request about the number of people that make up social groups at the university entity to decide sample size. The social groups considered were the next: students, academics (professors, researchers, technicians), gardeners and administrative personnel.

A copy of the survey format (see Supporting information 3) was included in this letter so that authorities could approve it.

## 2. Definition of the university community to be sampled

The next equation for a finite population was used to determine the sample size for each of the target social groups (Lohr 1999; Ríos-Martínez-Soto 2008):

(Ec. 1)

where: *n*=sample size, N=population size, number of individuals pertaining to each group of the university community at a university entity, *Za2*=1.962 (95% confidence), *p*= expected proportion (5%=0.05), *q*=1-*p*, y *d*=precision (3%).

## 3. Survey development

The university community was surveyed by trained personnel from November 2018 to March 2019. Before applying the survey, people were invited to voluntarily participate, and information such as the purposes of the research, the time it took to answer it, and the support of the pollster to clarify any doubt regarding the survey.

Once this information was given, potential respondents were asked about their agreement to participate in the survey. If they agreed to participate, a survey format and a pen were provided to them to answer the questions. Once the respondents finished answering the questions, the pollster proceeded to revise that the answers were complete and followed the instructions given. Finally, thanks were given to the respondents for their participation. In case that the respondent pertained to a social group different to students and did not have time to answer the survey, a format was given so that it could be answered later. The pollster visited the respondent’s office or a designed place to deposit the survey formats in particular university entities to retrieve them. The pollsters sought to complete the number of surveys required in each university entity. The Table S1 shows the community participation achieved at the different university entities. Some difficulties such as respondents with not enough time to answer the survey, absence of workers or refusal to participate were present. Nevertheless, the extra effort made by the pollsters to reach the number of required surveys was key for the success of the project and samples sizes over the 70% required were obtained for seven of the ten university entities.

## Table 1. Survey participation figures for the university entities. UE, university entities; AAPAUNAM, facilities of the “Asociación Autónoma del Personal Académico de la UNAM”; ANFFYL, facilities of the “Anexo de la Facultad de Filosofía y Letras”; SSC, cellar of the street sweepers at Study Unit 13; CMSTUNAM, facilities of “Comisiones Mixtas del Sindicato de Trabajadores de la UNAM”; DGOC, facilities of the “Dirección General de Obras y Conservación”; DGRL, facilities of the “Dirección General de Relaciones Laborales”; UOE, offices of the University Olympic Stadium; GARD, gardeners that work outside the facilities of the Olympic Stadium; GARDUOE, gardeners that work at the facilities of the University Olympic Stadium; SECU, security headship; UT, facilities of the “Unidad de Transparencia”. ; SG, social group; N, population size for a social group of a specific university entity; n, sample size for a social group in a university entity; SFP, number of survey formats provided; ASF, number of applied survey formats for this study and percentage with respect to the sample size (n); SD, number of surveys denied by the community; USF, number of survey formats that were given to respondents but that remained unanswered. ND, no data.

| **UE** | **SG** | **N** | **n** | **SFP** | **ASF** | **SD** | **USF** |
| --- | --- | --- | --- | --- | --- | --- | --- |
| AAPAUNAM | T | 102 | 68 | 68 | 48 (70.59%) | 20 | 0 |
| ANFFYL | T | 40 | 34 | 40 | 28 (82.35%) | 12 | 0 |
|  | A | 417 | 137 | 140 | 109 (79.56%) | SD | 31 |
|  | E | 7159 | 198 | 198 | 198 (100%) | SD | 0 |
| SSC | T | 5 | 5 | 3 | 3 (60%) | 0 | 0 |
| CMSTUNAM | T | 80 | 58 | 69 | 27 (46.55%) | 9 | 33 |
| DGRL | T | 169 | 93 | 74 | 48 (51.61%) | 4 | 26 |
| UOE | T | 8 | 8 | 8 | 8 (100%) | 0 | 0 |
| GARD | T | 8 | 8 | 8 | 7 (87.5%) | 0 | 1 |
| GARDUOE | T | 3 | 3 | 3 | 3 (100%) | 0 | 0 |
| SECU | T | 1 | 1 | 1 | 1 (100%) | 0 | 0 |
| UT | T | 28 | 25 | 28 | 20 (80%) | 8 | 0 |
| Totals |  | 8020 | 638 | 640 | 500 (78.37%) | 53 | 91 |

##

## 4. The study sites and survey results

The results of the survey were used to calculate the value given to the native ecosystem index and the disposition of the community to carry out restoration actions index for each study site. The survey formats applied at each university entity were assigned to the study sites as specified in Table S2. This assignation was determined considering the limits of the university entities facilities where the study sites are located.

Table 2. Survey formats of the university entities assigned to each Study Unit to evaluate the vaue given to the native ecosystem index and the disposition of the community to carry out restoration actions index for each Study Unit. AAPAUNAM, facilities of the “Asociación Autónoma del Personal Académico de la UNAM”; ANFFYL, facilities of the “Anexo de la Facultad de Filosofía y Letras”; SSC, cellar of the street sweepers at Study Unit 13; CMSTUNAM, facilities of “Comisiones Mixtas del Sindicato de Trabajadores de la UNAM”; DGOC, facilities of the “Dirección General de Obras y Conservación”; DGRL, facilities of the “Dirección General de Relaciones Laborales”; UOE, offices of the University Olympic Stadium; GARD, gardeners that work outside the facilities of the Olympic Stadium; GARDUOE, gardeners that work at the facilities of the University Olympic Stadium; SECU, security headship; UT, facilities of the “Unidad de Transparencia”.

| Study site | Assigned university entities |
| --- | --- |
| 1 | AAPAUNAM |
| 2 | AAPAUNAM |
| 3 | AAPAUNAM |
| 4 | AAPAUNAM |
| 5 | AAPAUNAM |
| 6 | GARD, SECU |
| 7 | GARD, CMSTUNAM, SECU |
| 8 | GARD, SECU |
| 9 | GARD, SECU |
| 10 | SECU, DGRL |
| 11 | GARD, SSC, SECU |
| 12 | GARD, SECU |
| 13 | GARD, SECU |
| 14 | GARD, SECU, ANFFYL |
| 15 | GARD, SECU, ANFFYL |
| 16 | GARD, SECU, ANFFYL |
| 17 | GARD, SECU, ANFFYL |
| 18 | GARD, SECU |
| 19 | UT, GARD, SECU |
| 20 | GARD, SECU, ANFFYL |
| 21 | UT, GARD, SECU |
| 22 | UT, GARD, SECU |
| 23 | UOE, SECU, GARDUOE |
| 24 | UOE, SECU, GARDUOE |
| 25 | GARD, SECU |
| 26 | GARD, SECU |
| 27 | UOE, SECU, GARDUOE |
| 28 | UOE, SECU, GARDUOE |
| 29 | UOE, SECU, GARDUOE |
| 30 | UOE, SECU, GARDUOE |
| 31 | UOE, SECU, GARDUOE |
| 32 | UOE, SECU, GARDUOE |
| 33 | UOE, SECU, GARDUOE |
| 34 | UOE, SECU, GARDUOE |
| 35 | GARD, SECU |
| 36 | UOE, SECU, GARDUOE |
| 37 | UOE, SECU, GARDUOE |
| 38 | UOE, SECU, GARDUOE |
| 39 | UOE, SECU, GARDUOE |

# References

Castillo A, Peña-Mondragón JL (2015) Métodos de investigación social: fundamentos, técnicas y aportaciones para el entendimiento de las relaciones sociedad-vida silvestre. Pages 189–210 In: Gallina, S (ed) Manual de técnicas del estudio de la fauna. Instituto de Ecología, A.C. Xalapa, Veracruz, Mexico

Hernández-Sampieri R, Fernández-Collado C, Baptista-Luico MP (2010) Metodología de la Investigación. McGraw-Hill Interamericana Editores, Mexico

Lohr SL (1999) Sampling Design and Analysis. Duxbury Press. Pacific Grove, CA

Ríos-Martínez-Soto RC (2008) Valuación Económica de la Biodiversidad en la Reserva Ecológica del Pedregal de San Ángel aplicaciones del método de Valuación Contingente. Masters’ dissertation. Universidad Nacional Autónoma de México, México
